# Supplementary material for: Slip, Slop, Slap, Slide, Seek and Sport: A Systematic Scoping Review of Sun Protection in Sport in Australasia
Source: Preprints.org preprint supplement (doi:10.20944/preprints202211.0099.v1), 2022-11-07
Supplement: Supplementary file 3 [file supplementary]

Archive with 2 entries (2 files):
- Supplementary table and figure for current oncology 1NOV22.pdf
- __MACOSX/._Supplementary table and figure for current oncology 1NOV22.pdf
